# Supplementary material for: Automated segmentation of colorectal liver metastasis and liver ablation on contrast-enhanced CT images
Source: PubMed Central journal article supplement (PMC9403767; doi:10.3389/fonc.2022.886517), 2022-08-11
Supplement: Image_1.pdf [file Image_1.pdf]

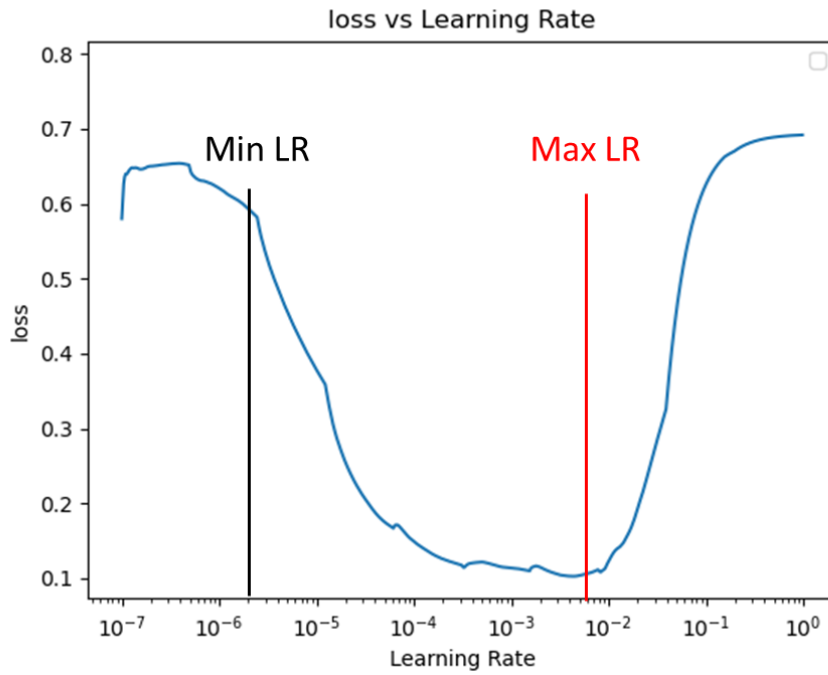

**Supplementary Figure 1:** Learning rate finder figure. The learning rate is gradually increased from  $10e-7$  to  $10e-0$ ; the point where loss begins to decrease is the minimum learning rate (min LR), and the point where it begins to increase is the maximum learning rate (max LR).
