# Supplementary material for: Automated segmentation of colorectal liver metastasis and liver ablation on contrast-enhanced CT images
Source: PubMed Central journal article supplement (PMC9403767; doi:10.3389/fonc.2022.886517), 2022-08-11
Supplement: Image_2.pdf [file Image_2.pdf]

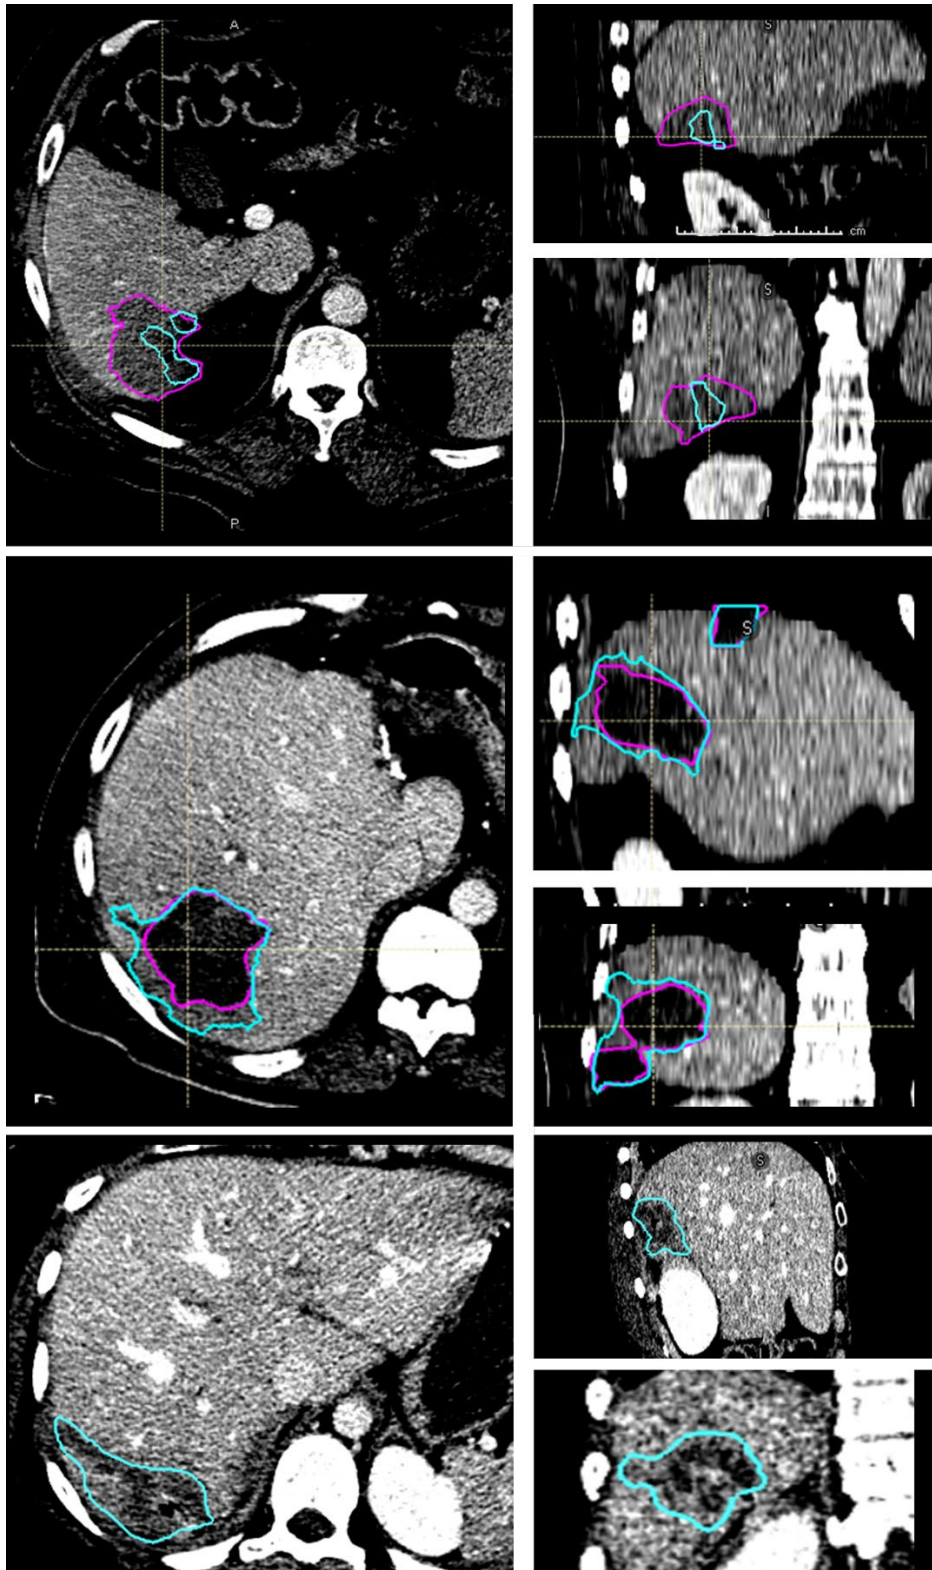

**Supplementary Figure 2:** Three cases where majority voting had a Likert Score less than 4. (Top) We believe that the top failed due to similarity in appearance to the gallbladder. (Middle, Bottom) Model over-segmented regions around the ablation zones.
